# Supplementary material
Source: PubMed Central journal article supplement (PMC5544558)
Supplement: NIHMS870550-supplement-1.pdf [file NIHMS870550-supplement-1.pdf]

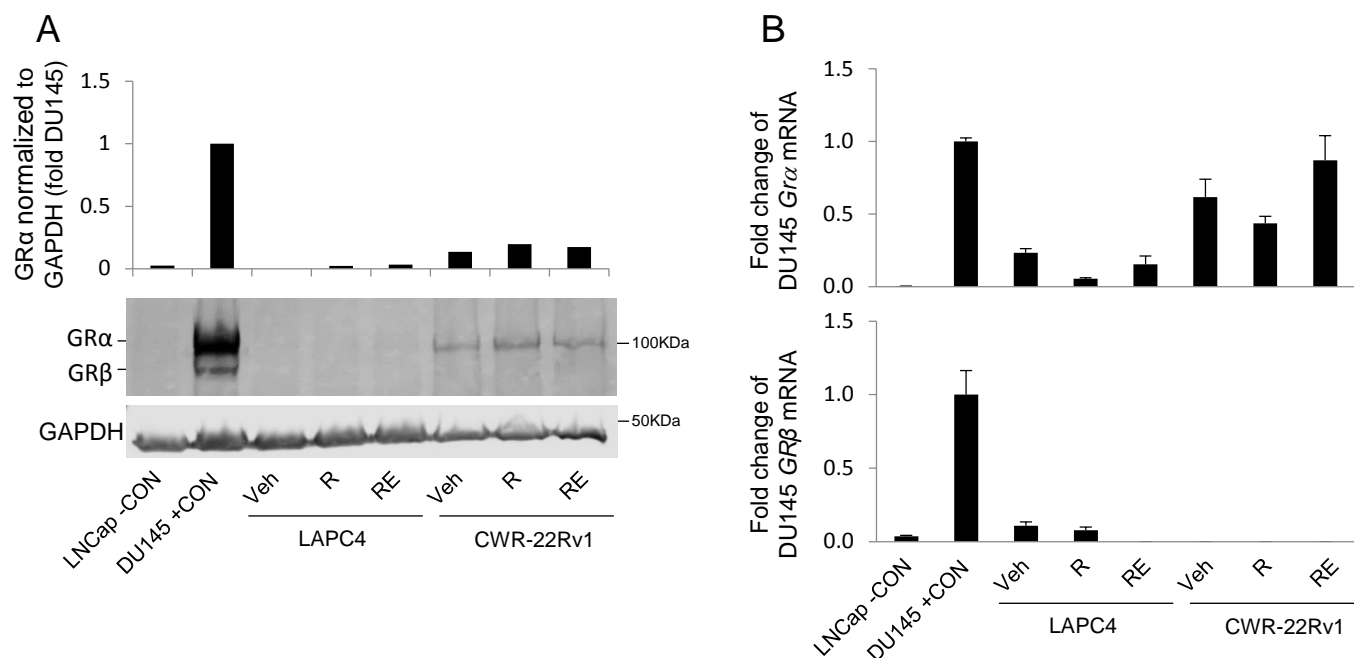

**Supplemental Figure 1. Analysis of GR expression.** CWR-22Rv1 express higher GRα compared to LAPC4. LAPC4 and CWR-22Rv1 cells were treated with vehicle (Veh), or R1881 (R, 1nM) +/- enzalutamide (E, 10μM). DU145 was utilized as a positive control and LNCap as a negative control. **A.** Cell lysates were analyzed by Western blot analysis for GR (antibody detects both α and β) and β-actin. **B.** RNA was isolated and qRT-PCR was performed for *GRα* and *GRβ* normalized to *GAPDH* relative to DU145. Errors bars represent SEM.

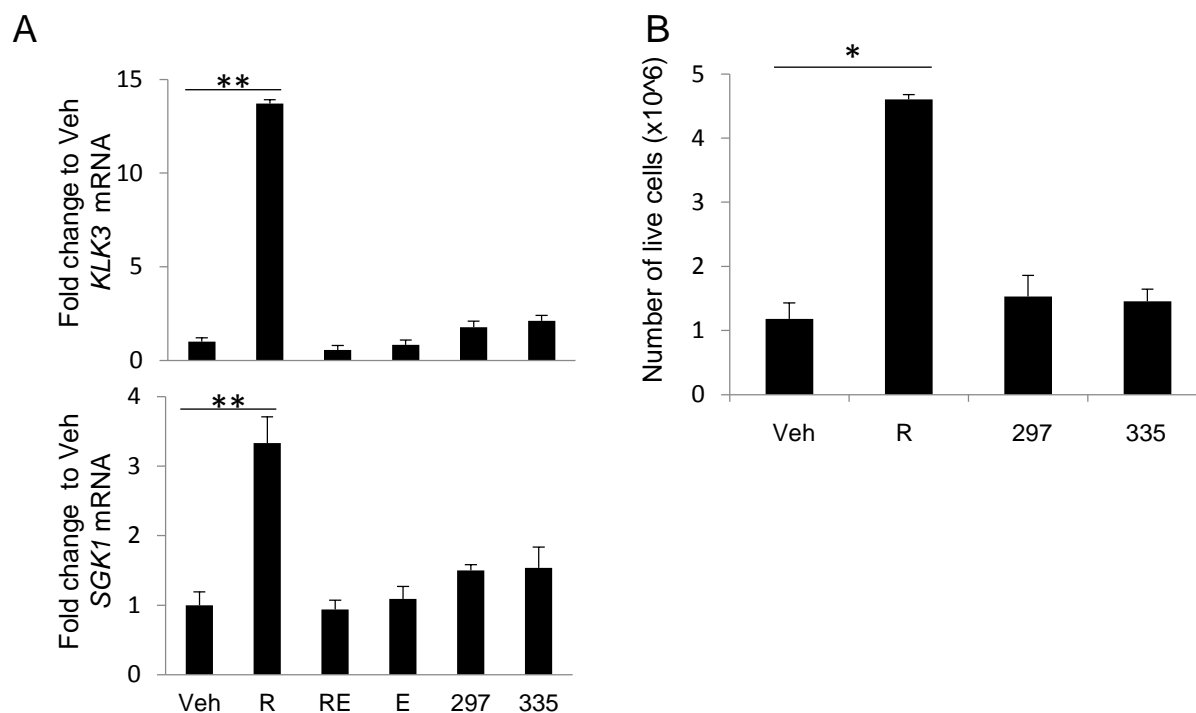

**Supplemental figure 2. Single agent treatment of PC cells with CORT108297 or CORT118335 does not impact *KLK3* and *SGK1* mRNA expression or cell viability.** **A.** LAPC4 cells were treated with R1881 (R, 1nM), +/- enzalutamide (E, 10μM), or CORT108297 (297, 1μM), or CORT118335 (335, 1μM) for 3 days. RNA was isolated and qRT-PCR was performed. Relative changes in *KLK3* and *SGK1* normalized to *GAPDH* are shown relative to Veh. **B.** LAPC4 cells were plated at 1.25X10<sup>5</sup> cells per well, then treated with vehicle (Veh), or CORT108297 (297, 1μM), or CORT118335 (335, 1μM) for 7 days. Error bars indicate SEM. \*p<0.05, \*\*p<0.01

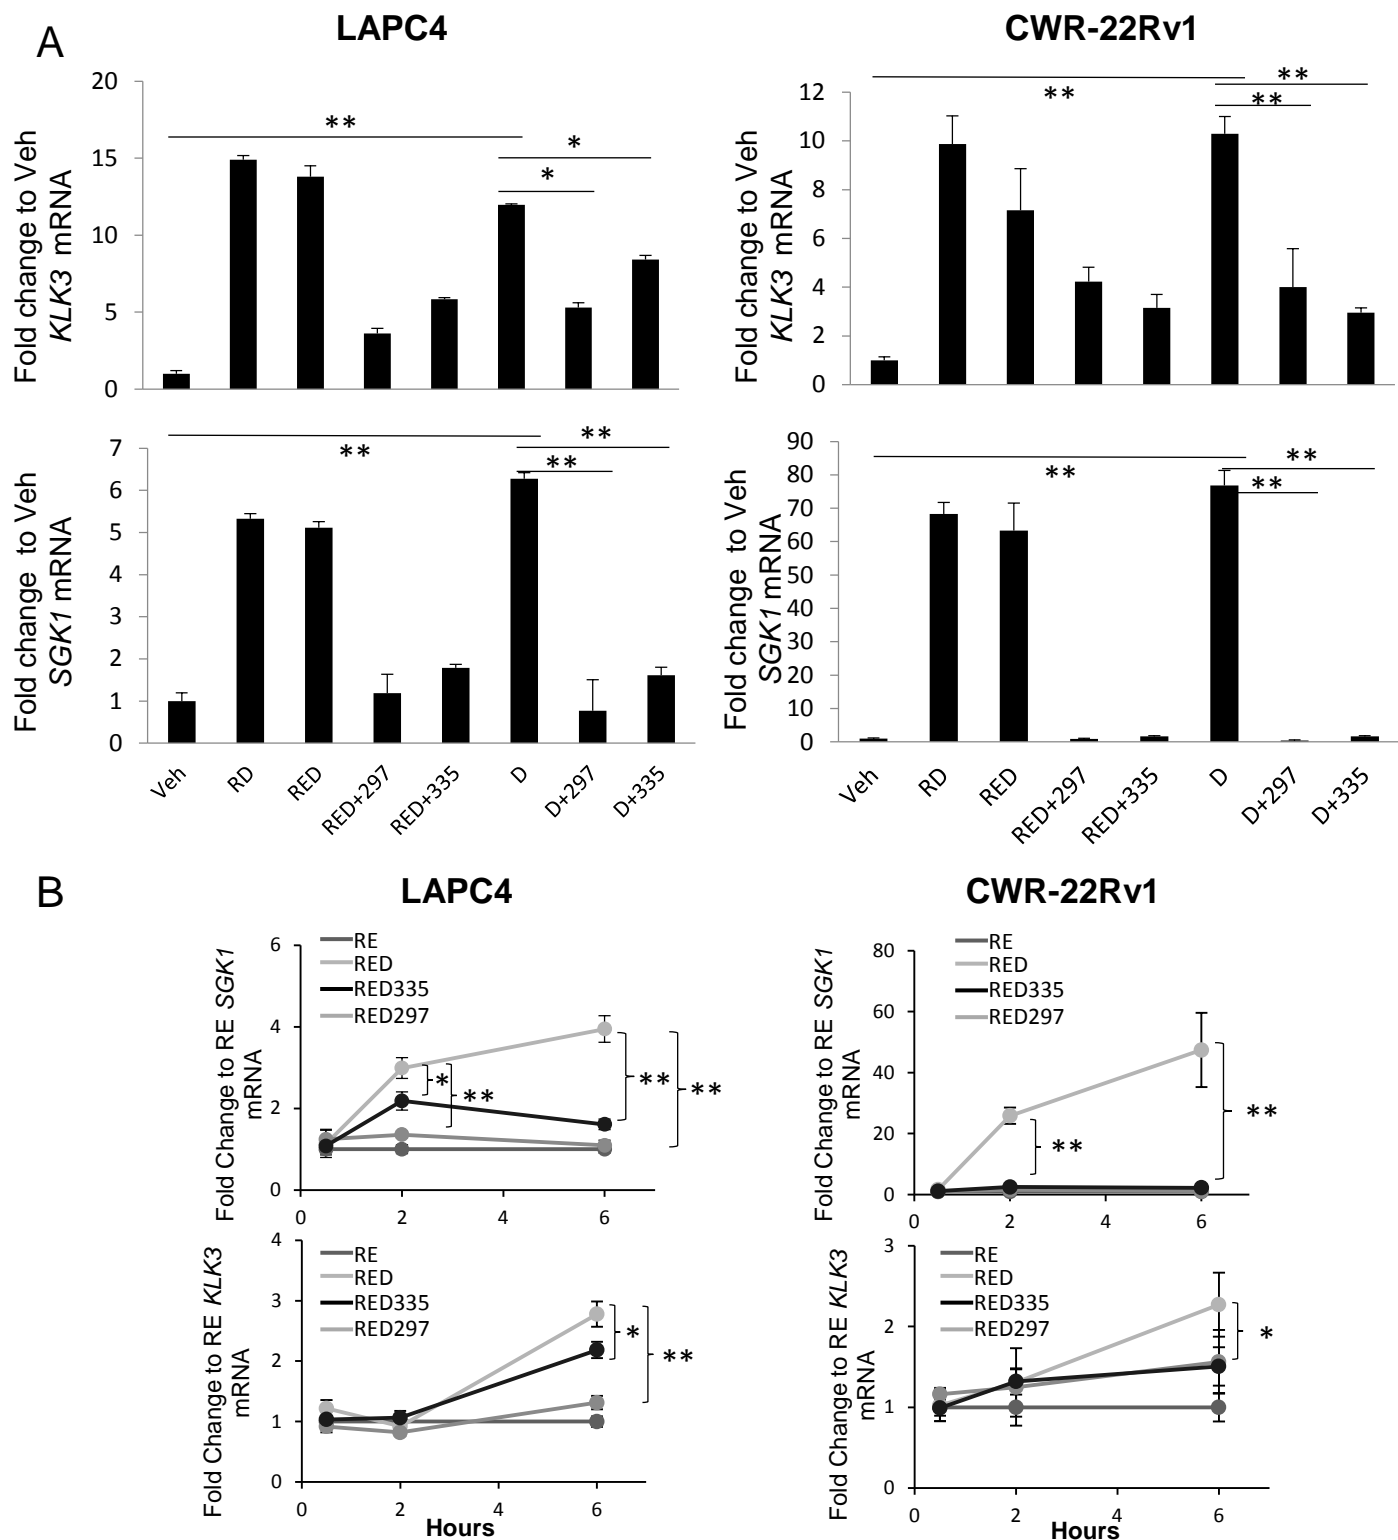

**Supplemental figure 3. Expression of *KLK3* and *SGK1* is induced by dexamethasone and inhibited by SGRM treatment at various time-points. A.** LAPC4 and CWR-22Rv1 cells were treated with R1881 (R, 1nM), +/- enzalutamide (E, 10μM), +/- dexamethasone (D, 100nM), +/- CORT108297 (297, 1μM), or CORT118335 (335, 1μM) for 3 days. **B.** LAPC4 and CWR-22Rv1 cells were treated with vehicle (Veh), R1881 (R, 1nM) and enzalutamide (E, 10μM) for three days, then dexamethasone (D, 100nM) and specified SGRM (297 or 335, 1μM) were added for 2 or 6 hours and qRT-PCR was performed to quantify *SGK1* and *KLK3* mRNA normalized to *GAPDH*. Data is representative of 3 independent experiments. Error bars represent SEM. Statistical significance was determined by Student's t-test. \*p<0.05, \*\*p<0.01

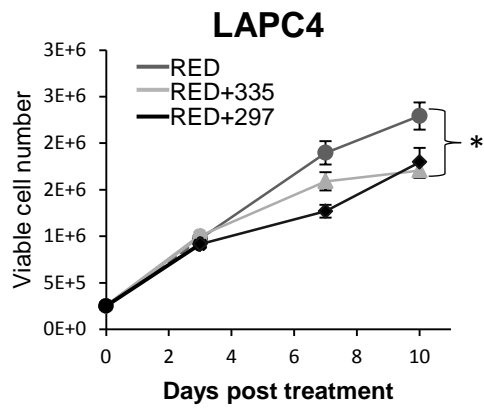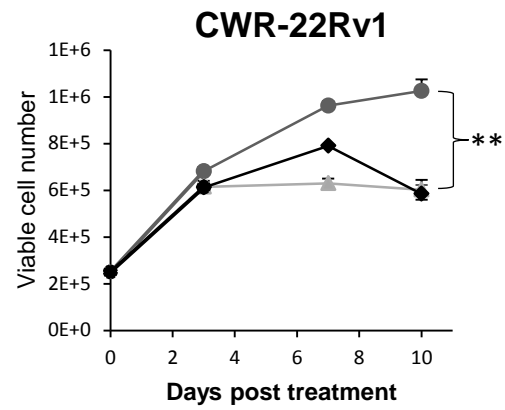

**Supplemental figure 4. SGRMs inhibit PC growth following AR blockade.** Cells were treated as in Figure 3 then assessed for the total number of viable cells by trypan blue exclusion assay at days 3, 7, and 10. Error bars represent SEM. Statistical significance was determined by Student's t-test, \* $p < 0.05$ , \*\* $p < 0.01$ .

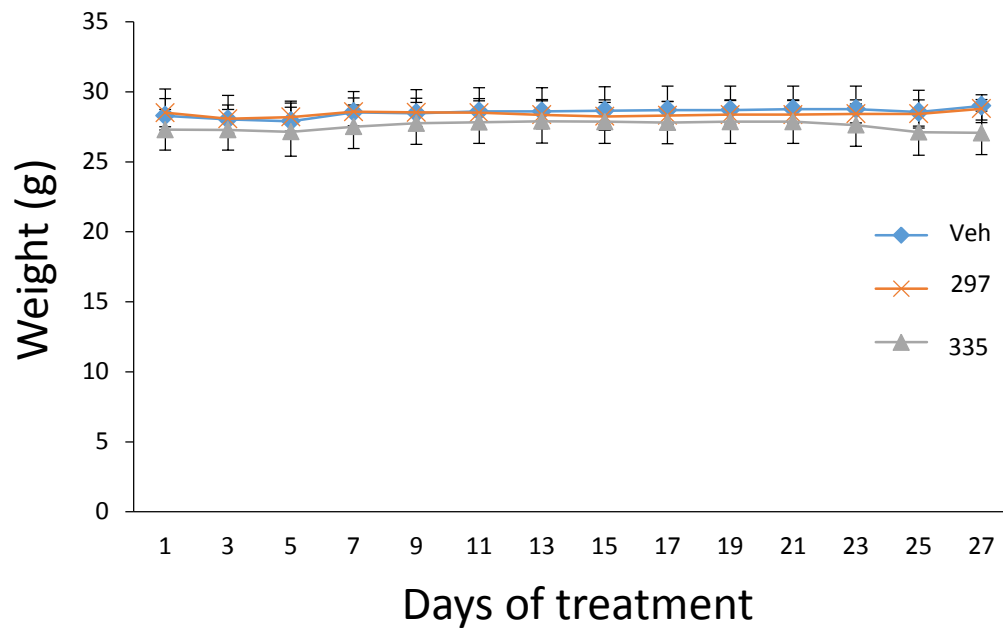

**Supplemental figure 5. SGRMs do not impact the weight of mice over 4 weeks of administration.** LAPC4 xenografted mice were treated with vehicle (Veh), or 20mg/kg CORT108297 (297), or CORT118335 (335). Error bars represent SEM.

### CWR-22Rv1 tumor size over time

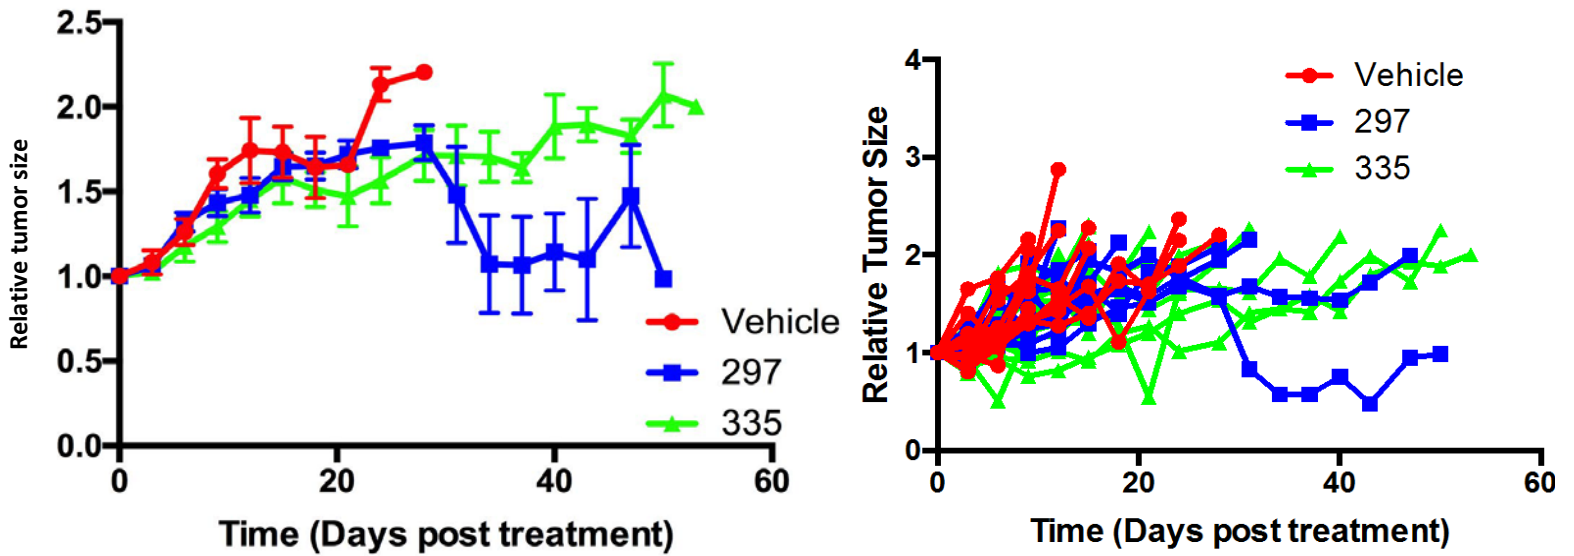

**Supplemental figure 6. SGRMs inhibit CWR-22Rv1 tumor growth in xenograft mice.** Mice were treated as in Figure 4B. Average relative tumor volume of CWR-22Rv1 xenografts (left panel) and individual relative tumor volumes (right panel) are shown.

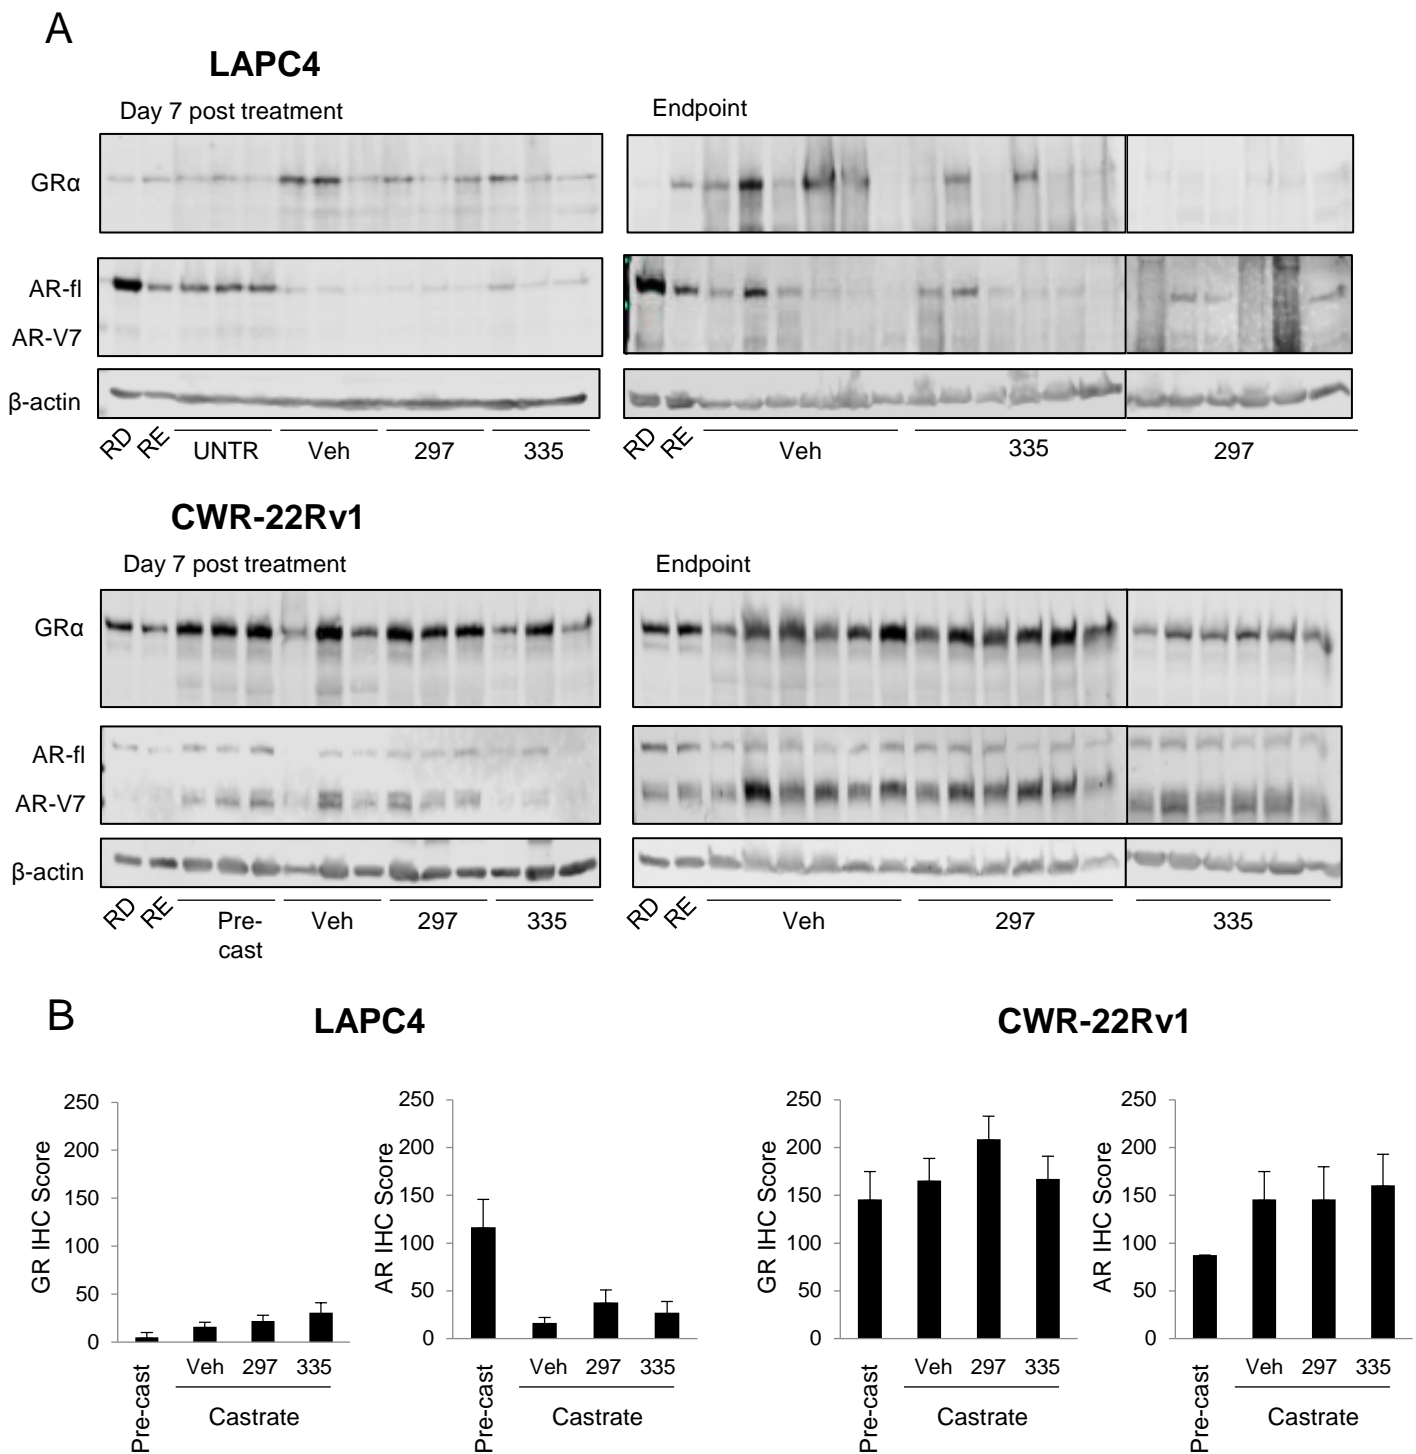

**Supplemental figure 7. GR and AR protein levels are altered in xenografts post castration.** LAPC4 and CWR-22Rv1 tumors were dissected from mice prior to castration (Pre-cast), at day 7 following Veh, 297, or 335 treatment, and at the endpoint (tumor doubling from size at castration) and **A**. lysed for Western blot analysis and **B**. formalin-fixed for immunohistochemistry. Cultured LAPC4 and CWR-22Rv1 treated with RD or RE were used as controls. For **A** n= 3-6 tumors per condition. For **B** serial sections of tumor tissue were labeled with antibodies for GR and AR and slides were analyzed by a pathologist blinded to treatment conditions. Composite scores were determined as described in methods. n=3 Pre-cast, n=8-12 Veh/297/335. Error bars represent SEM.

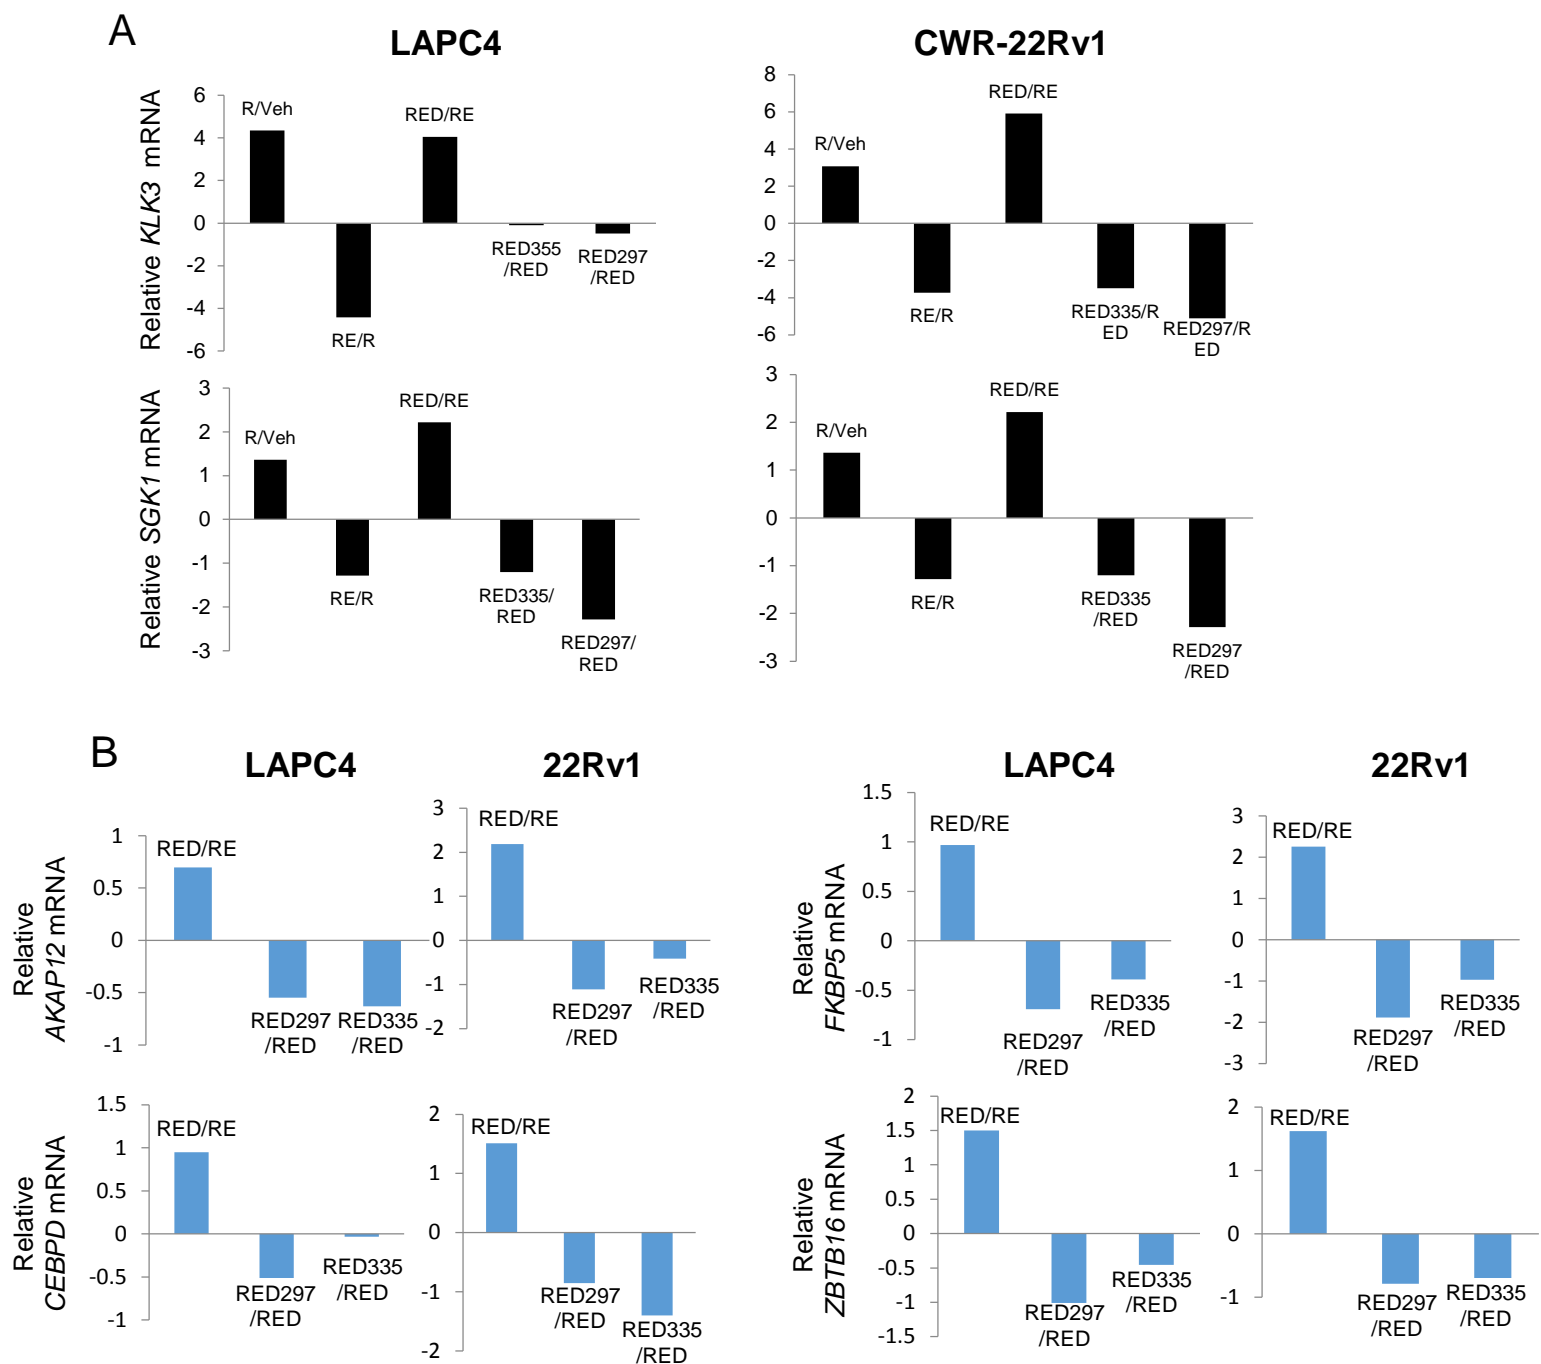

**Supplemental figure 8. RNA-seq data validates AR and GR dependent gene expression changes and uncovers novel proliferation pathway GR targets.** LAPC4 and CWR-22Rv1 cells were treated with R1881 (R, 1nM) and enzalutamide (E, 10 $\mu$ M) for 3 days, then dexamethasone (D, 100nM) +/- CORT108297 (297, 1 $\mu$ M), or CORT118335 (335, 1 $\mu$ M) for 6 hours. RNA was isolated and sequenced. **A** Relative change in FPKM values for *KLK3* and *SGK1* are shown. **B** FPKM values are shown for genes that are involved in IPA proliferation pathways and are upregulated by dexamethasone and downregulated by CORT108297 and CORT118335 in both LAPC4 and CWR-22Rv1 cells.
